# Supplementary material for: A high-resolution and harmonized model approach for reconstructing and analysing historic land changes in Europe
Source: Copernicus journal article supplement (doi:10.5194/bg-10-1543-2013), 2013-03-07
Supplement: Supplementary file 1 [file S1 - Harmonization.docx]

Table S1: Harmonization scheme for data sets used in the HILDA approach.

| **CLC** | **(CLC 90/2000/2006; BioPress)** |  |  |  |  |  |
| --- | --- | --- | --- | --- | --- | --- |
|  |  |  |  |  |  |  |
| **CLC Class Number** | **CLC Class Name** | **LCCS label** | **Classifiers** | **LCCS Code** | **IPPC Land use category** | **Notes** |
| 111 | Continuous urban fabric | High density urban areas | A4 Non Linear (Feature) | 5003-13 | Settlement |  |
|  |  |  | A13 Urban Areas |  |  |  |
|  |  |  | A14 High Density |  |  |  |
| 112 | Discontinuous urban fabric | Medium density areas // Low density urban areas | A4 Non Linear (Feature) | 5003-14 // 5003-15 | Settlement |  |
|  |  |  | A13 Urban Areas |  |  |  |
|  |  |  | A15 Medium Density |  |  |  |
|  |  |  | A16 Low Density |  |  |  |
| 121 | Industrial or commercial units | Industrial and/or other areas | A4 Non Linear (Feature) | 5003-8 | Settlement |  |
|  |  |  | A12 Industrial and/or other areas |  |  |  |
| 122 | Road and rail networks and associated land | Roads // Railways // Industrial and/or other areas built-up object: other - installations associated to roads and railways | A3 Linear | 5002-3 // 5002-6 // 5003-8-A44Zp122 | Settlement |  |
|  |  |  | A7 Roads |  |  |  |
|  |  |  | A10 Railways |  |  |  |
|  |  |  | A4 Non Linear (Feature) |  |  |  |
|  |  |  | A12 Industrial and/or other areas |  |  |  |
|  |  |  | A44 Other |  |  |  |
|  |  |  | Zp122 Installations associated to roads and railways | |  |  |
| 123 | Port Areas | Industrial and/or other areas built up object: Port Area (including docks, shipyards, locks) | A4 Non Linear (Feature) | 5003-8-A32 | Settlement |  |
|  |  |  | A12 Industrial and/or other areas |  |  |  |
|  |  |  | A32 Port area (including docks, shipyard, locks) | |  |  |
| 124 | Airports | Industrial and/other areas built-up object: airport | A4 Non Linear (Feature) | 5003-8-A21 | Settlement |  |
|  |  |  | A12 Industrial and/or other areas |  |  |  |
|  |  |  | A21 Airport |  |  |  |
| 131 | Mineral extraction sites | Extraction Sites | A2 Non built up areas | 5004-2 | Settlement |  |
|  |  |  | A6 Extraction Sites |  |  |  |
| 132 | Dump Sites | Waste Dumps/Deposits | A2 Non built up areas | 5004-1 | Settlement |  |
|  |  |  | A5 Waste Dumps/Deposits |  |  |  |
| 133 | Construction Sites | Built up areas / Bare areas | A1 Built up areas | 5001 / 0011 | Settlement |  |
|  |  |  | B16 Bare areas |  |  |  |
| 141 | Green urban areas | Vegetated urban areas | A6 Urban Vegetated Areas | 11176 | Settlement |  |
| 142 | Sport and leisure facilities | Built up areas built up object: Sports and leisure facilities | A1 Built up areas | 5001-A38 | Settlement |  |
|  |  |  | A38 Sports and Leisure Facilities |  |  |  |
| 211 | Non irrigated arable land | Herbaceous crops // shrub crops | A3 Herbaceous crops | 10025 // 10013 (1) [Z211] | Cropland |  |
|  |  |  | A2 Shrub crops |  |  |  |
|  |  |  | Z211 Nurseries of fruit and trees and shrubs |  |  |  |
| 212 | Permanently irrigated land | Surface irrigated herbaceous crops // surface irrigated shrub crops // surface irrigated tree crops | A3 Herbaceous crops | 11500-13227 // 11495-13227 // 11491-13227 | Cropland |  |
|  |  |  | D3 Irrigated (general) |  |  |  |
|  |  |  | D4 Surface irrigated |  |  |  |
|  |  |  | A2 Shrub crops |  |  |  |
|  |  |  | A1 Tree crops |  |  |  |
| 213 | Rice fields | Graminoid crops dominant crop: cereals - rice (oryza spp.) | A4 Graminoid crops | 10037-S0308 | Cropland |  |
|  |  |  | S0380 Rice (Oryza spp.) |  |  |  |
|  |  |  | (Mode1: Terrestrial and/or Aquatic or regularly flooded) | |  |  |
| 221 | Vineyards | Broadleaved deciduous shrub crops dominant crop: fruits & nuts - grapes (Vitis vinifera) | A2 Shrub crops | 10013-1891-S0610 | Cropland |  |
|  |  |  | A7 Broadleaved |  |  |  |
|  |  |  | A10 Deciduous |  |  |  |
|  |  |  | S0610 Grapes (Vitis vinifera) |  |  |  |
| 222 | Fruit trees and berry plantations | Broadleaved tree crops crop type: fruits & nuts // broadleaved shrub crops crop type: fruits & nuts // broadleaved shrub crops crop type: beverage | A1 Tree crops | 10001-3781-S6 // 10013-3781-S6 // 10013-3781-S8 | Cropland |  |
|  |  |  | A7 Broadleaved |  |  |  |
|  |  |  | S6 Fruits & Nuts |  |  |  |
|  |  |  | A2 Shrub crops |  |  |  |
|  |  |  | S8 Beverages |  |  |  |
| 223 | Olive groves | Boradleaved evergreen tree crops dominant crop: industrial crops - olive (olea europaea L.) // fields of broadleaved evergreen tree crops (one additional crop)(shrub crop with simultaneous period). Dominant crop: industrial crops - olive (Olea europaea L.) Second crop: fruit & nuts -grapes (vitis vinifera) | A1 Tree crops | 10001-1-S0910 // 11345-1275-S0910S0610 | Cropland |  |
|  |  |  | A7 Broadleaved |  |  |  |
|  |  |  | A9 Evergreen |  |  |  |
|  |  |  | S0910 Olive (Olea europaea L.) |  |  |  |
|  |  |  | C2 Intercropped (Second crop) |  |  |  |
|  |  |  | C3 One additional crop |  |  |  |
|  |  |  | C6 Shrub crops (additional crop) |  |  |  |
|  |  |  | C17 With simultaneous period (second crop) |  |  |  |
|  |  |  | S0610 Grapes (Vitis vinifera) |  |  |  |
| 231 | Pastures | Closed to open (100-40%) Grassland | A6 Gramnoids | 21461-121340 | Grassland |  |
|  |  |  | A20 Closed to open (100-15%) |  |  |  |
|  |  |  | A21 Closed to open (100-40%) |  |  |  |
|  |  |  | (Mode2: Cultivated - managed and/or natural and semi-natural terrestrial vegetation) | | |  |
| 241 | Annual crops associated with permanent crops | Fields of herbaceous crops (one additional crop) (tree crop with simultaneous period) // fields of herbaceous crops (one additional crop) (shrub crop with simultaneous period) | A3 Herbaceous crops | 11370-12602 // 11370-12614 | Cropland |  |
|  |  |  | C2 Intercropped (Second crop) |  |  |  |
|  |  |  | C3 One additional crop |  |  |  |
|  |  |  | C5 Tree crop (additional crop) |  |  |  |
|  |  |  | C17 With simultaneous period (second crop) |  |  |  |
|  |  |  | C6 Shrub crops (additional crop) |  |  |  |
| 242 | Complex Cultivation Patterns | Small sized fields of herbaceous crops // small sized fields of shrubs // small sized fields of tree crops // scattered urban areas | A3 Herbaceous crops | 11250 // 11215 // 11195 // 5002-17 | Cropland |  |
|  |  |  | B2 Small sized fields |  |  |  |
|  |  |  | C2 Intercropped (Second crop) |  |  |  |
|  |  |  | A2 Shrub crops |  |  |  |
|  |  |  | A1 Tree crops |  |  |  |
|  |  |  | A4 Non Linear (Feature) |  |  |  |
|  |  |  | A13 Urban Areas |  |  |  |
|  |  |  | A17 Scattered Density |  |  |  |
| 243 | Land principally occupied by agriculture, with significant areas of natural vegetation | Cultivated and Managed terrestrial areas / natural and semi-natural primarily terrestrial vegetation | A11 Cultivated and Managed terrestrial areas | 0003 / 0004 | Grassland |  |
|  |  |  | A12 Natural and semi-natural primarily terrestrial vegetation | |  |  |
| 244 | Agro forestry areas | Closed to open woodlamd with herbaceous layer // continuous closed to open trees + continuous fields of herbaceous crops | A3 Trees (Main layer) | 21575(1)[Z244] // 2144710027 | Cropland |  |
|  |  |  | A20 Closed to open (100-15%) |  |  |  |
|  |  |  | B2 >30-3m (trees height main layer) |  |  |  |
|  |  |  | C1 Continuous (vegetation main pattern) |  |  |  |
|  |  |  | F2 Second and/or third layer present |  |  |  |
|  |  |  | F4 Herbaceous vegetation (second or third layer) | |  |  |
|  |  |  | F7 Closed (>70-60%) to open (70-60%) -(20-10%) (second or third layer) | |  |  |
|  |  |  | G4 3-0.03m (Herbaceous height second or third layer) | |  |  |
|  |  |  | Z244 Grazing land (pasture) |  |  |  |
|  |  |  | A3 Herbaceous crops |  |  |  |
|  |  |  | B5 Continuous |  |  |  |
| 311 | Broad-leaved forest | Broadleaved closed to open (100-40%) Trees | A3 Trees (Main layer) | 21495-121340 | Forest |  |
|  |  |  | A20 Closed to open (100-15%) |  |  |  |
|  |  |  | B2 >30-3m (trees height main layer) |  |  |  |
|  |  |  | D1 Broadleaved |  |  |  |
|  |  |  | A21 Closed to open (100-40%) |  |  |  |
| 312 | Coniferous forest | Needleleaved closed to open (100-40%) Trees | A3 Trees (Main layer) | 21498-121340 | Forest |  |
|  |  |  | A20 Closed to open (100-15%) |  |  |  |
|  |  |  | B2 >30-3m (trees height main layer) |  |  |  |
|  |  |  | D2 Needleleaved |  |  |  |
|  |  |  | A21 Closed to open (100-40%) |  |  |  |
| 313 | Mixed Forest | Mixed closed to open (100-40%) Trees // Mixed closed to open (100-40%) Trees | A3 Trees (Main layer) | 21497-129398 // 21499-129398 | Forest |  |
|  |  |  | A20 Closed to open (100-15%) |  |  |  |
|  |  |  | B2 >30-3m (trees height main layer) |  |  |  |
|  |  |  | D1 Broadleaved |  |  |  |
|  |  |  | E2 Deciduous |  |  |  |
|  |  |  | A21 Closed to open (100-40%) |  |  |  |
|  |  |  | E3 Mixed |  |  |  |
|  |  |  | D2 Needleleaved |  |  |  |
|  |  |  | E1 Evergreen |  |  |  |
| 321 | Natural grasslands | Herbaceous closed to open (100-40%) Vegetation | A2 Herbaceous Vegetation (Main Layer) | 21453-121340 | Grassland |  |
|  |  |  | A20 Closed to open (100-15%) |  |  |  |
|  |  |  | A21 Closed to open (100-40%) |  |  |  |
| 322 | Moors and heathland | Closed to open (100-40%) Shrubland (Thicket) // Closed to open (100-40%) Shrubland (thicket) / Herbaceous Closed to open | A4 Shrubs (Main Layer) | 21450-121340 // 21450-121340 / 21453-121340 | Grassland |  |
|  |  |  | A20 Closed to open (100-15%) |  |  |  |
|  |  |  | B3 5-0.3m (Shrubs height main layer) |  |  |  |
|  |  |  | A21 Closed to open (100-40%) |  |  |  |
|  |  |  | A2 Herbaceous Vegetation (Main Layer) |  |  |  |
| 323 | Sclerophyllous vegetation | Broadleaved evergreen clsoed to open (100-40%) Thicket | A4 Shrubs (Main Layer) | 21517-121340 | Grassland |  |
|  |  |  | A20 Closed to open (100-15%) |  |  |  |
|  |  |  | B3 5-0.3m (Shrubs height main layer) |  |  |  |
|  |  |  | D1 Broadleaved |  |  |  |
|  |  |  | E1 Evergreen |  |  |  |
|  |  |  | A21 Closed to open (100-40%) |  |  |  |
| 324 | Transitional woodland-shrub | Closed to open (100-40%) woody vegetation // closed to open (100-40%) woody vegetation with herbaceous layer | A1 Woody vegetation (Main Layer) | 21441-121340 // 21548-121340 | Forest |  |
|  |  |  | A20 Closed to open (100-15%) |  |  |  |
|  |  |  | A21 Closed to open (100-40%) |  |  |  |
|  |  |  | B1 7-2m (Height for woody vegetation main layer) | |  |  |
|  |  |  | F2 Second and/or third layer present |  |  |  |
|  |  |  | F4 Herbaceous vegetation (second or third layer) | |  |  |
|  |  |  | F7 Closed (>70-60%) to open (70-60%) -(20-10%) (second or third layer) | |  |  |
|  |  |  | G4 3-0.03m (Herbaceous height second or third layer) | |  |  |
| 331 | Beaches, dunes, sands | Loose and shifting sands // bare rock and/or coarse fragments - gravels | A6 Loose and shifting sands | 6006 // 6002-8(1)[Z331] | Others |  |
|  |  |  | A3 Bare rock and/or coarse fragments |  |  |  |
|  |  |  | A14 Gravel |  |  |  |
|  |  |  | Z331 Gravel accumulation along stream channels | |  |  |
| 332 | Bare rocks | Bare rock and/or coarse fragments // herbaceous sparse vegetation | A3 Bare rock and/or coarse fragments | 6002 // 20058 | Others |  |
|  |  |  | A2 Herbaceous Vegetation (Main Layer) |  |  |  |
|  |  |  | A14 Sparse (20-10)-1% (Main Layer) |  |  |  |
| 333 | Sparsely vegetated areas | Heraceous open (40-(20-10)%) Vegetation | A2 Herbaceous Vegetation (Main Layer) | 20037-3012 | Others |  |
|  |  |  | A11 Open General (70-60%) - (20-10%) (Main Layer) | |  |  |
|  |  |  | A13 Very Open 40-(10-20%) (Main Layer) |  |  |  |
| 334 | Burnt areas | Natural and semi-natural primarily terrestrial vegetation | A12 Natural and semi-natural primarily terrestrial vegetation | 0004(3)[Z334] | Others |  |
|  |  |  | Z334 Burnt |  |  |  |
| 335 | Glaciers and perpetual snow | Perennial ice // perennial snow | A3 Ice | 8009 // 8006 | Others |  |
|  |  |  | B1 Perennial |  |  |  |
|  |  |  | A2 Snow |  |  |  |
| 411 | Inland marshes | Closed to open (100-40%) Herbaceous Vegetation | A2 Herbaceous Vegetation (Main Layer) | 42155-60686 | Grassland |  |
|  |  |  | A20 Closed to open (100-15%) |  |  |  |
|  |  |  | A21 Closed to open (100-40%) |  |  |  |
| 412 | Peat bogs | Closed to open herbaceous vegetation / closed to open lichens/mosses // Bare soil and/or other unconsolidated materials | A2 Herbaceous Vegetation (Main Layer) | 42155 / 422606005(1)[Z412] | Grassland |  |
|  |  |  | A20 Closed to open (100-15%) |  |  |  |
|  |  |  | A7 Lichens/Mosses |  |  |  |
|  |  |  | A5 Bare soil and other unconsilated materials |  |  |  |
|  |  |  | Z412 Peat extracting areas |  |  |  |
| 421 | Salt marshes | Closed to open herbaceous vegetation water quality: saline water | A2 Herbaceous Vegetation (Main Layer) | 42155-R3 | Grassland |  |
|  |  |  | A20 Closed to open (100-15%) |  |  |  |
|  |  |  | R3 Saline water |  |  |  |
| 422 | Salines | Shallow Artificial Perennial waterbodies (standing) Salinity: Brine // shallow artificial non-perennial waterbodies (standing) (surface aspect: bare soil) salinity: brine | A1 Artificial Waterbodies | 7013-5-V5 // 7019-7-V5 | Others |  |
|  |  |  | B1 Perennial |  |  |  |
|  |  |  | C2 Shallow |  |  |  |
|  |  |  | A5 (Standing) |  |  |  |
|  |  |  | V5 Brine |  |  |  |
|  |  |  | B2 Non-Perennial |  |  |  |
|  |  |  | B4 (surface aspect: bare soil) |  |  |  |
| 423 | Intertidal flats | Tidal area | A1 Inland Water | 8004 | Others |  |
|  |  |  | B3 Tidal area |  |  |  |
| 511 | Water courses | Natural waterbodies (flowing) // Artificial waterbodies (flowing) | A1 Inland Water | 8001-1 // 7001-1 | Others |  |
|  |  |  | A4 (Flowing) |  |  |  |
|  |  |  | A1 Artificial Waterbodies |  |  |  |
| 512 | Water bodies | Natural waterbodies (standing) // Artificial waterbodies (standing) | A1 Inland Water | 8001-5 // 7001-5 | Others |  |
|  |  |  | A5 (Standing) |  |  |  |
|  |  |  | A1 Artificial Waterbodies |  |  |  |
| 521 | Coastal lagoons | Natural waterbodies (standing) // Artificial waterbodies (standing) | A1 Inland Water | 8001-5(5)[Z521] // 7001-5(5)[Z521] | Others |  |
|  |  |  | A5 (Standing) |  |  |  |
|  |  |  | A1 Artificial Waterbodies |  |  |  |
|  |  |  | Z521 Coastal lagoons, salt or brackish water |  |  |  |
| 522 | Estuaries | Tidal area (flowing) Salinity: slightly Saline | A1 Inland Water | 8004-1-V2 | Others |  |
|  |  |  | B3 Tidal area |  |  |  |
|  |  |  | A4 (Flowing) |  |  |  |
|  |  |  | V2 Slightly Saline |  |  |  |
| 523 | Sea and ocean | Perennial natural waterbodies salinity: moderately saline // perennial natural waterbodies salinity: very saline // perennial natural waterbodies salinity: brine | A1 Inland Water | 8002-V3 // 8002-V4 // 8002-V5 | Others |  |
|  |  |  | B1 Perennial |  |  |  |
|  |  |  | V3 Moderately saline |  |  |  |
|  |  |  | V4 Very Saline |  |  |  |
|  |  |  | V5 Brine |  |  |  |
| **UMD Class Number** | **UMD Class Name** | **LCCS label** | **Classifiers** | **LCCS Code** | **IPPC Land use category** | **Notes** |
| 0 | Water Bodies | Artificial waterbodies // Natural waterbodies | A1 Artificial Waterbodies | 7001 // 8001 | Others |  |
|  |  |  | A1 Inland water |  |  |  |
| 1 | Evergreen Needleleaf Forests | Needleleafed Evergreen Trees | A3 Trees (Main layer) | 20092 | Forest |  |
|  |  |  | A10 Closed > (70-60%) (Main Layer) |  |  |  |
|  |  |  | B2 >30-3m (trees height main layer) |  |  |  |
|  |  |  | D2 Needleleaved |  |  |  |
|  |  |  | E1 Evergreen |  |  |  |
| 2 | Evergreen Broadleaved Forests | Broadleaved Evergreen Trees | A3 Trees (Main layer) | 20089 | Forest |  |
|  |  |  | A10 Closed > (70-60%) (Main Layer) |  |  |  |
|  |  |  | B2 >30-3m (trees height main layer) |  |  |  |
|  |  |  | D1 Broadleaved |  |  |  |
|  |  |  | E1 Evergreen |  |  |  |
| 3 | Deciduous Needleleaved Forests | Needleleaved Deciduous Trees | A3 Trees (Main layer) | 20093 | Forest |  |
|  |  |  | A10 Closed > (70-60%) (Main Layer) |  |  |  |
|  |  |  | B2 >30-3m (trees height main layer) |  |  |  |
|  |  |  | D2 Needleleaved |  |  |  |
|  |  |  | E1 Evergreen |  |  |  |
| 4 | Deciduous Broadleaved Forests | Broadleaved Deciduous Trees | A3 Trees (Main layer) | 20090 | Forest |  |
|  |  |  | A10 Closed > (70-60%) (Main Layer) |  |  |  |
|  |  |  | B2 >30-3m (trees height main layer) |  |  |  |
|  |  |  | D1 Broadleaved |  |  |  |
|  |  |  | E2 Deciduous |  |  |  |
| 5 | Mixed Forests | Mixed Trees // Mixed Trees | A3 Trees (Main layer) | 20090-15045 // 20092-15045 | Forest |  |
|  |  |  | A10 Closed > (70-60%) (Main Layer) |  |  |  |
|  |  |  | B2 >30-3m (trees height main layer) |  |  |  |
|  |  |  | D1 Broadleaved |  |  |  |
|  |  |  | E2 Deciduous |  |  |  |
|  |  |  | E3 Mixed |  |  |  |
|  |  |  | D2 Needleleaved |  |  |  |
|  |  |  | E1 Evergreen |  |  |  |
| 6 | Woodlands | ((70-60)-40%) Woodland with herbaceous layer // ((70-60)-40%) Woodland with shrubs | A3 Trees (Main layer) | 20317-1 // 20314-1 | ??? | Overlapping with forests AND grasslands. Not possible to separate |
|  |  |  | A11 Open General (70-60%) - (20-10%) (Main Layer) | |  |  |
|  |  |  | B2 >30-3m (trees height main layer) |  |  |  |
|  |  |  | F2 Second and/or third layer present |  |  |  |
|  |  |  | F4 Herbaceous vegetation (second or third layer) | |  |  |
|  |  |  | F7 Closed (>70-60%) to open (70-60%) -(20-10%) (second or third layer) | |  |  |
|  |  |  | G4 3-0.03m (Herbaceous height second or third layer) | |  |  |
|  |  |  | A12 Open (70-60)-40% (Main Layer) |  |  |  |
|  |  |  | F6 Shrubs (second or third layer) |  |  |  |
|  |  |  | G3 5-0.3m (shrubs height second or third layer) |  |  |  |
| 7 | Wooded grasslands / shrubland | (40-(20-10)%) Woodland with herbaceous layer // (40-(20-10)%) woodland with shrubs | A3 Trees (Main layer) | 20317-3012 // 20314-3012 | Grassland |  |
|  |  |  | A11 Open General (70-60%) - (20-10%) (Main Layer) | |  |  |
|  |  |  | B2 >30-3m (trees height main layer) |  |  |  |
|  |  |  | F2 Second and/or third layer present |  |  |  |
|  |  |  | F4 Herbaceous vegetation (second or third layer) | |  |  |
|  |  |  | F7 Closed (>70-60%) to open (70-60%) -(20-10%) (second or third layer) | |  |  |
|  |  |  | G4 3-0.03m (Herbaceous height second or third layer) | |  |  |
|  |  |  | A13 Very Open 40-(10-20%) (Main Layer) |  |  |  |
|  |  |  | F6 Shrubs (second or third layer) |  |  |  |
|  |  |  | G3 5-0.3m (shrubs height second or third layer) |  |  |  |
| 8 | Closed Bushlands or shrublands | Closed to open (100-40%) Shrubland (Thicket) | A4 Shrubs (Main Layer) | 21449-121340 | Grassland |  |
|  |  |  | A20 Closed to open (100-15%) |  |  |  |
|  |  |  | A21 Closed to open (100-40%) |  |  |  |
| 9 | Open Shrubland | Open (40-(20-10)%) Medium High shrubs (shrubland) | A4 Shrubs (Main Layer) | 20022-4439 | Grassland |  |
|  |  |  | A11 Open General (70-60%) - (20-10%) (Main Layer) | |  |  |
|  |  |  | B3 5-0.3m (Shrubs height main layer) |  |  |  |
|  |  |  | A13 Very Open 40-(10-20%) (Main Layer) |  |  |  |
|  |  |  | B9 Medium High 3-0.5m (Shrubs height main layer) | |  |  |
| 10 | Grasslands | Continuous Closed to Open Herbaceous Vegetation | A2 Herbaceous Vegetation (Main Layer) | 21455 | Grassland |  |
|  |  |  | A20 Closed to open (100-15%) |  |  |  |
|  |  |  | B4 3-0.03m (Herbaceous Height Main Layer) |  |  |  |
|  |  |  | C1 Continuous (vegetation main pattern) |  |  |  |
| 11 | Croplands | Continuous Fields of herbaceous Crops | A3 Herbaceous crops | 10027 | Cropland | (note: perennial woody crops will be classified as the appropriate forest or shrubs land cover type!) |
|  |  |  | B5 Continuous (field spatial distribution) |  |  |  |
| 12 | Barren | Bare areas // snow // ice | B16 Bare areas | 0011 // 8005 // 8008 | Others |  |
|  |  |  | A2 Snow |  |  |  |
|  |  |  | A3 Ice |  |  |  |
| 13 | Urban and Built up | Built up Areas | A1 Built up areas | 5001 | Settlement |  |

Harmonization without LCCS, due to poor class descriptions, too broad classes, etc. Harmonization for a data set was partly done by cross comparison with the other used data sets, to check the consistency in reporting scheme and trends over time.

| **GlobCorine Class Number** | **GlobCorine Class Name** | **IPPC Land use category** | **Notes** |
| --- | --- | --- | --- |
| 10 | Urban and associated areas | Settlement | (note: includes CLC classes; Continuous urban fabric (111), Discontinuous urban fabric (112), Industrial or commercial units (121), Road and rail networks and associated land (122), Port areas (123), Airports (124), Mineral extraction sites (131), Dump sites (132), Construction sites (133), Green urban areas (141), Sport and leisure facilities (142)) |
| 20 | Rainfed cropland | Cropland | (note: includes CLC classes; Non-irrigated arable land (211), Vineyards (221), Fruit trees and berry plantations (222), Olive groves (223)) |
| 30 | Irrigated cropland | Cropland | (note: includes CLC classes; Permanently irrigated land (212), Rice fields (213)) |
| 40 | Forest | Forest | (note: includes CLC classes; Broadleaved forest (311), Coniferous forest (312), Mixed forest (313)) |
| 50 | Heathland and sclerophyllous vegetation | Grassland | (note: includes CLC classes; Moors and heathland (322), Sclerophyllous vegetation (323)) |
| 60 | Grassland | Grassland | (note: includes CLC classes; Pastures (231), Natural grasslands (321)) |
| 70 | Sparsely vegetated area | Others | (note: includes CLC classes; Sparsely vegetated areas (333)) |
| 80 | Vegetated low-lying areas on regularly flooded soil | Grassland | (note: includes CLC classes; Inland marshes (411), Peat bogs (412), Salt marshes (421), Intertidal flats (423)) |
| 90 | Bare areas | Others | (note: includes CLC classes; Bare rocks (332), Beaches, dunes, sands (331)) |
| 100 | Complex cropland | Cropland | (note: includes CLC classes; Annual crops associated with permanent crops (241), Complex cultivation patterns (242)) |
| 110 | Mosaic cropland / natural vegetation | Cropland | (note: includes CLC classes; Land principally occupied by agriculture, with significant areas of natural vegetation (243), Agro-forestry areas (244)) |
| 120 | Mosaic of natural (herbaceous, shrub, tree) vegetation | Forest | (note: includes CLC classes; Transitional woodland-shrub (324)) |
| 200 | Water bodies | Others | (note: includes CLC classes; Water courses (511), Water bodies (512), Coastal lagoons (521), Estuaries (522), Sea and ocean (523)) |
| 210 | Permanent snow and ice | Others | (note: includes CLC classes; Glaciers and perpetual snow (335)) |
| **Eurostat Class Number** | **Eurostat Class Name** | **IPPC Land use category** | **Notes** |
| L0001 | Arable Land | Cropland |  |
| L0002 | Permanent grassland | Grassland |  |
| L0003 | Land under permanent crops | Cropland |  |
| L0004 | Kitchen gardens | Cropland |  |
| L0005 | Utilized agricultural areas (UAA) | --- | (note: this class is an aggregation of: Arable land (L0001), Permantent grassland (L0002, Land under permanent crops (L0003) and Kitchen gardens (L0004)) |
| L0006 | Wooded area | Forest |  |
| L2410 | Vineyards | Cropland |  |
| L2450 | Olives | Cropland |  |
| L2610 | Fodder from arable land | --- |  |
| L2696 | Fallow and green manures | --- |  |
| **FAOStat Class Number** | **FAOStat Class Name** | **IPPC Land use category** | **Notes** |
|  | Arable land and Permanent crops | Cropland |  |
|  | Forest area | Forest |  |
|  | Permanent meadows and pastures | Grassland |  |
|  | Other land & Inland Water | Other land & Settlements |  |
| **Year of FRA Report** | **FRA Class Name** | **IPPC Land use category** | **Notes** |
| 1992 | Forest and other wooded land (O.W.L.) (1000 ha) | Forest |  |
| 1992 | Non-forest land; other land (1000 ha) + Inland Waters (1000ha) | Settlement & Other Land |  |
| 1992 | Non-forest land; agricultural land (1000 ha) | Cropland & Grassland |  |
| 1985 | Forest and other wooded land (1000 ha) | Forest |  |
| 1985 | Non-forest land: area of other land; including built up and related land (land under transport and communication facilities; etc.) (1000 ha) | Settlement & Other Land |  |
| 1985 | Non-forest land; agricultural land (1000 ha) | Cropland & Grassland |  |
| 1976 | Forest and other wooded land (1000 ha) | Forest |  |
| 1976 | Non-forest land: Other (mil. ha) | Settlement & Other Land |  |
| 1976 | Non-forest land: Agricultural (mil. ha) + Other wooded land (1000 ha) | Cropland & Grassland |  |
| 1963 | Total - Forest land - Terres forestières - Tierras forestales | Forest |  |
| 1963 | Water - Other - Non-forest land - Terres non forestières - Tierras no forestales | Settlement & Other Land |  |
| 1963 | Agricultural - Non-forest land - Terres non forestières - Tierras no forestales | Cropland & Grassland |  |
| 1953/1958 | Total forests (1000 ha) | Forest |  |
| 1953/1958 | Non-forest land: other (1000 ha) | Settlement & Other Land |  |
| 1953/1958 | Non-forest land: agricultural land (1000 ha) + Non-forest land: brush land (1000 ha) | Cropland & Grassland |  |
| 1946 | Forested Land - Total Forest | Forest |  |
| 1946 | Other Lands | Settlement & Other Land |  |
| 1946 | Cultivated Lands and Grassland | Cropland & Grassland |  |
