# Supplementary material for: A high-resolution and harmonized model approach for reconstructing and analysing historic land changes in Europe
Source: Copernicus journal article supplement (doi:10.5194/bg-10-1543-2013), 2013-03-07
Supplement: Supplementary file 5 [file S3 - Model comparison for European regions.docx]

**Figure S3:** Model comparison for European regions

**Western Europe:**


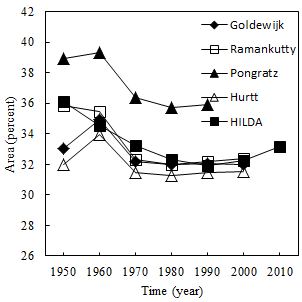


Area fractions for cropland, compared in decadal time steps from 1950 to 2010 for Western Europe.

**Northern Europe:**


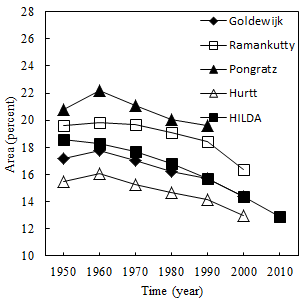


Area fractions for cropland, compared in decadal time steps from 1950 to 2010 for Northern Europe.

**Southern Europe:**


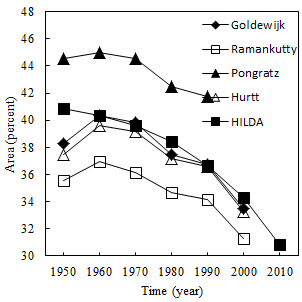


Area fractions for cropland, compared in decadal time steps from 1950 to 2010 for Southern Europe.

**Eastern Europe:**


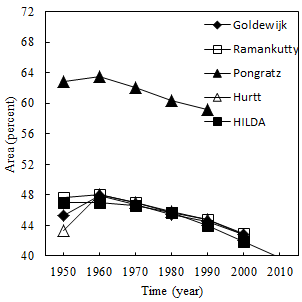


Area fractions for cropland, compared in decadal time steps from 1950 to 2010 for Eastern Europe.
