# Supplementary material for: A high-resolution and harmonized model approach for reconstructing and analysing historic land changes in Europe
Source: Copernicus journal article supplement (doi:10.5194/bg-10-1543-2013), 2013-03-07
Supplement: Supplementary file 7 [file S4 - Influence of varying population density on the settlement area and overall results.docx]

Table S4 - Influence of varying population density on the settlement area and overall results

Part 1: Estimated settlement area in per cent calculated with population density of year 2000:

| Year | UK | Sweden | Finland | Slovenia | Slovakia | Romania | Portugal | Poland | Malta | Hungary | Luxembourg | Lithuania | Latvia | Cyprus |
| --- | --- | --- | --- | --- | --- | --- | --- | --- | --- | --- | --- | --- | --- | --- |
| 2010 | 7.367316 | 1.339349 | 1.393566 | 2.794742 | 6.110581 | 6.392672 | 2.572038 | 3.471535 | 28.86196 | 5.47059 | 8.400652 | 3.008391 | 1.405717 | 7.856456 |
| 2000 | 7.360328 | 1.303519 | 1.365943 | 2.648547 | 5.640304 | 6.28253 | 2.668441 | 3.336673 | 27.96985 | 5.676436 | 8.707216 | 3.291874 | 1.30277 | 7.17008 |
| 1990 | 7.133934 | 1.262018 | 1.321298 | 2.747888 | 5.532838 | 6.505562 | 2.57243 | 3.296715 | 26.02476 | 5.86414 | 7.652157 | 3.300508 | 1.466323 | 6.683188 |
| 1980 | 6.968204 | 1.221956 | 1.265576 | 2.623815 | 5.212636 | 6.223745 | 2.547338 | 3.08533 | 23.81642 | 6.05303 | 7.263976 | 3.036517 | 1.37599 | 5.962776 |
| 1970 | 6.853801 | 1.187183 | 1.215485 | 2.379515 | 4.738599 | 5.707879 | 2.259643 | 2.818291 | 22.14189 | 5.840797 | 6.764316 | 2.775998 | 1.289936 | 5.832308 |
| 1960 | 6.477321 | 1.101507 | 1.17528 | 2.183169 | 4.171508 | 5.184613 | 2.318616 | 2.572483 | 23.54586 | 5.642976 | 6.268638 | 2.45264 | 1.151394 | 5.42294 |
| 1950 | 6.260141 | 1.034488 | 1.065211 | 2.023921 | 3.595019 | 4.572482 | 2.219658 | 2.14329 | 22.81462 | 5.277856 | 5.8924 | 2.290472 | 1.065669 | 4.670384 |
| 1940 | 5.963806 | 0.936002 | 0.976871 | 1.842551 | 3.711152 | 4.460069 | 2.024036 | 2.323912 | 19.64836 | 5.258017 | 5.653519 | 2.567902 | 1.116676 | 3.791142 |
| 1930 | 5.67316 | 0.902331 | 0.915308 | 1.699654 | 3.471575 | 5.060679 | 1.780421 | 2.667888 | 17.66671 | 4.910644 | 5.968046 | 1.805925 | 1.042139 | 3.261706 |
| 1920 | 5.242559 | 0.867411 | 0.832016 | 1.507292 | 3.070852 | 4.558802 | 1.573583 | 2.33764 | 16.43092 | 4.516077 | 5.235477 | 1.805925 | 0.875351 | 2.941208 |
| 1910 | 5.013159 | 0.811278 | 0.778039 | 1.815208 | 3.0461 | 1.939892 | 1.540719 | 1.076419 | 16.70879 | 4.30407 | 5.15585 | 1.741841 | 1.2154 | 2.533731 |
| 1900 | 4.37897 | 0.754572 | 0.702043 | 1.742385 | 2.906364 | 1.681987 | 1.42152 | 2.167637 | 13.63028 | 3.875703 | 4.672116 | 1.631385 | 1.101319 | 2.193379 |
|  | | | | | | | | | | | | | | |
| Year | Italy | Spain | Greece | Estonia | Germany | Czech Republic | Bulgaria | Ireland | Denmark | Netherlands | France | Belgium | Austria | Switzerland |
| 2010 | 4.615144 | 1.570962 | 2.146836 | 2.018438 | 7.705723 | 6.404527 | 4.801121 | 1.964641 | 6.580543 | 13.33325 | 4.929732 | 20.16686 | 4.236019 | 6.509033 |
| 2000 | 4.680955 | 1.608718 | 2.117574 | 2.004543 | 8.089744 | 6.099442 | 4.891454 | 1.856265 | 6.654616 | 12.73365 | 4.795297 | 20.33864 | 4.175878 | 6.448749 |
| 1990 | 4.610165 | 1.56838 | 2.021397 | 2.297217 | 7.843214 | 6.154011 | 5.395454 | 1.721199 | 6.417806 | 11.95369 | 4.584207 | 19.89081 | 4.011623 | 6.084746 |
| 1980 | 4.587148 | 1.513776 | 1.92602 | 2.148905 | 7.647882 | 6.137207 | 5.32793 | 1.678084 | 6.389748 | 11.3105 | 4.354827 | 19.58777 | 3.88923 | 5.635319 |
| 1970 | 4.382405 | 1.369192 | 1.756299 | 1.983335 | 7.59258 | 5.824818 | 5.095587 | 1.452485 | 6.173515 | 10.40075 | 4.103624 | 19.16576 | 3.850973 | 5.550161 |
| 1960 | 4.091278 | 1.237886 | 1.663338 | 1.768474 | 7.100634 | 5.747449 | 4.722133 | 1.379355 | 5.728577 | 9.16439 | 3.692389 | 18.22702 | 3.637545 | 4.744964 |
| 1950 | 3.825703 | 1.126558 | 1.508857 | 1.610363 | 6.680795 | 5.28234 | 4.35186 | 1.451849 | 5.32479 | 8.048269 | 3.38081 | 17.15622 | 3.570865 | 4.173819 |
| 1940 | 3.556302 | 1.040846 | 1.467091 | 1.541619 | 6.912356 | 5.202892 | 3.923006 | 1.446961 | 4.794182 | 7.090837 | 3.152158 | 16.67762 | 3.449862 | 3.744487 |
| 1930 | 3.305825 | 0.94777 | 1.275777 | 1.638153 | 6.380155 | 6.338261 | 3.463842 | 1.432296 | 4.427432 | 6.280938 | 3.36311 | 16.06994 | 3.441623 | 3.599664 |
| 1920 | 3.073054 | 0.856842 | 1.00209 | 1.593981 | 6.070039 | 5.972254 | 2.909243 | 2.131334 | 3.819633 | 5.421272 | 3.152158 | 14.82636 | 3.32371 | 3.434925 |
| 1910 | 2.807324 | 0.801497 | 1.062632 | 0.689487 | 6.343614 | 6.117493 | 2.603433 | 2.141111 | 3.416844 | 4.702235 | 3.195803 | 14.74295 | 3.423241 | 3.322413 |
| 1900 | 2.637562 | 0.747874 | 0.991124 | 0.665792 | 5.506299 | 5.603397 | 2.247386 | 2.185107 | 3.030267 | 4.096937 | 3.144075 | 13.29265 | 3.091385 | 2.934863 |

Each value per country and time is the settlement area per country in per cent

The values on this slide are derived using the population density of the year 2000

Part 2: Estimated settlement area in per cent calculated with population density of year 2000 decreased by 10%:

| Year | UK | Sweden | Finland | Slovenia | Slovakia | Romania | Portugal | Poland | Malta | Hungary | Luxembourg | Lithuania | Latvia | Cyprus |
| --- | --- | --- | --- | --- | --- | --- | --- | --- | --- | --- | --- | --- | --- | --- |
| 2010 | 6.630585 | 1.205414 | 1.25421 | 2.515268 | 5.499523 | 5.753405 | 2.314834 | 3.124382 | 25.97577 | 4.923531 | 7.560586 | 2.707552 | 1.265146 | 7.070811 |
| 2000 | 6.624296 | 1.173167 | 1.229349 | 2.383692 | 5.076273 | 5.654277 | 2.401597 | 3.003006 | 25.17287 | 5.108793 | 7.836494 | 2.962687 | 1.172493 | 6.453072 |
| 1990 | 6.42054 | 1.135816 | 1.189168 | 2.473099 | 4.979555 | 5.855006 | 2.315187 | 2.967044 | 23.42228 | 5.277726 | 6.886942 | 2.970457 | 1.31969 | 6.014869 |
| 1980 | 6.271383 | 1.099761 | 1.139018 | 2.361433 | 4.691372 | 5.60137 | 2.292604 | 2.776797 | 21.43478 | 5.447727 | 6.537578 | 2.732865 | 1.238391 | 5.366499 |
| 1970 | 6.168421 | 1.068465 | 1.093936 | 2.141564 | 4.264739 | 5.137091 | 2.033679 | 2.536462 | 19.9277 | 5.256717 | 6.087885 | 2.498398 | 1.160943 | 5.249077 |
| 1960 | 5.829589 | 0.991357 | 1.057752 | 1.964852 | 3.754357 | 4.666152 | 2.086755 | 2.315235 | 21.19128 | 5.078679 | 5.641774 | 2.207376 | 1.036254 | 4.880646 |
| 1950 | 5.634127 | 0.93104 | 0.95869 | 1.821529 | 3.235517 | 4.115234 | 1.997692 | 1.928961 | 20.53316 | 4.75007 | 5.30316 | 2.061425 | 0.959102 | 4.203346 |
| 1940 | 5.367425 | 0.842402 | 0.879184 | 1.658296 | 3.340037 | 4.014062 | 1.821632 | 2.091521 | 17.68353 | 4.732216 | 5.088167 | 2.311112 | 1.005008 | 3.412028 |
| 1930 | 5.105844 | 0.812098 | 0.823777 | 1.529688 | 3.124417 | 4.554611 | 1.602379 | 2.401099 | 15.90004 | 4.41958 | 5.371241 | 1.625332 | 0.937926 | 2.935535 |
| 1920 | 4.718303 | 0.78067 | 0.748815 | 1.356563 | 2.814053 | 4.102922 | 1.416225 | 2.103876 | 14.78783 | 4.064469 | 4.711929 | 1.625332 | 0.787816 | 2.647087 |
| 1910 | 4.511843 | 0.73015 | 0.700235 | 1.633687 | 2.74149 | 1.745903 | 1.386647 | 0.968777 | 15.03791 | 3.873663 | 4.640265 | 1.567657 | 1.09386 | 2.280358 |
| 1900 | 3.941073 | 0.679115 | 0.631839 | 1.568147 | 2.615728 | 1.513788 | 1.279368 | 1.950874 | 12.26725 | 3.488133 | 4.204904 | 1.468246 | 0.991187 | 1.974041 |
|  | | | | | | | | | | | | | | |
| Year | Italy | Spain | Greece | Estonia | Germany | Czech Republic | Bulgaria | Ireland | Denmark | Netherlands | France | Belgium | Austria | Switzerland |
| 2010 | 4.15363 | 1.413866 | 1.932152 | 1.816594 | 6.935151 | 5.764075 | 4.321009 | 1.768176 | 5.922489 | 11.99992 | 4.436759 | 18.15017 | 3.812417 | 5.85813 |
| 2000 | 4.21286 | 1.447846 | 1.905816 | 1.804089 | 7.28077 | 5.489498 | 4.402308 | 1.670639 | 5.989155 | 11.46028 | 4.315767 | 18.30477 | 3.75829 | 5.803874 |
| 1990 | 4.149149 | 1.411542 | 1.819258 | 2.067495 | 7.058893 | 5.53861 | 4.855909 | 1.549079 | 5.776026 | 10.75832 | 4.125787 | 17.90173 | 3.610461 | 5.476272 |
| 1980 | 4.128433 | 1.362398 | 1.733418 | 1.934015 | 6.883093 | 5.523486 | 4.795137 | 1.510275 | 5.750774 | 10.17945 | 3.919344 | 17.62899 | 3.500307 | 5.071788 |
| 1970 | 3.944165 | 1.232273 | 1.580669 | 1.785002 | 6.833322 | 5.242337 | 4.586028 | 1.307236 | 5.556163 | 9.360676 | 3.693262 | 17.24918 | 3.465875 | 4.995145 |
| 1960 | 3.682151 | 1.114097 | 1.497005 | 1.591626 | 6.390571 | 5.172704 | 4.24992 | 1.241419 | 5.155719 | 8.247951 | 3.32315 | 16.40432 | 3.27379 | 4.270467 |
| 1950 | 3.443133 | 1.013902 | 1.357972 | 1.449326 | 6.012715 | 4.754106 | 3.916674 | 1.306664 | 4.792311 | 7.243442 | 3.042729 | 15.4406 | 3.213778 | 3.756437 |
| 1940 | 3.200672 | 0.936761 | 1.320382 | 1.387457 | 6.221121 | 4.682603 | 3.530706 | 1.302265 | 4.314764 | 6.381754 | 2.836942 | 15.00986 | 3.104876 | 3.370038 |
| 1930 | 2.975243 | 0.852993 | 1.1482 | 1.474338 | 5.74214 | 5.704435 | 3.117458 | 1.289066 | 3.984689 | 5.652844 | 3.026799 | 14.46294 | 3.097461 | 3.239698 |
| 1920 | 2.765748 | 0.771158 | 0.901881 | 1.434583 | 5.463035 | 5.375029 | 2.618319 | 1.918201 | 3.43767 | 4.879145 | 2.836942 | 13.34373 | 2.991339 | 3.091432 |
| 1910 | 2.526592 | 0.721348 | 0.956369 | 0.620538 | 5.709252 | 5.505744 | 2.34309 | 1.927 | 3.07516 | 4.232011 | 2.876223 | 13.26866 | 3.080917 | 2.990172 |
| 1900 | 2.373806 | 0.673087 | 0.892012 | 0.599213 | 4.955669 | 5.043058 | 2.022647 | 1.966596 | 2.72724 | 3.687243 | 2.829668 | 11.96338 | 2.782247 | 2.641377 |

Each value per country and time is the settlement area per country in per cent

The values on this slide are derived using the population density of the year 2000 lowered by 10%

Part 3: Estimated settlement area in per cent calculated with population density of year 2000 decreased by 20%:

| Year | UK | Sweden | Finland | Slovenia | Slovakia | Romania | Portugal | Poland | Malta | Hungary | Luxembourg | Lithuania | Latvia | Cyprus |
| --- | --- | --- | --- | --- | --- | --- | --- | --- | --- | --- | --- | --- | --- | --- |
| 2010 | 5.893853 | 1.07148 | 1.114853 | 2.235793 | 4.888465 | 5.114138 | 2.057631 | 2.777228 | 23.08957 | 4.376472 | 6.720521 | 2.406713 | 1.124574 | 6.285165 |
| 2000 | 5.888263 | 1.042815 | 1.092755 | 2.118837 | 4.512243 | 5.026024 | 2.134753 | 2.669338 | 22.37588 | 4.541149 | 6.965773 | 2.6335 | 1.042216 | 5.736064 |
| 1990 | 5.707147 | 1.009614 | 1.057038 | 2.19831 | 4.426271 | 5.204449 | 2.057944 | 2.637372 | 20.81981 | 4.691312 | 6.121726 | 2.640406 | 1.173058 | 5.34655 |
| 1980 | 5.574563 | 0.977565 | 1.012461 | 2.099052 | 4.170109 | 4.978996 | 2.03787 | 2.468264 | 19.05314 | 4.842424 | 5.811181 | 2.429214 | 1.100792 | 4.770221 |
| 1970 | 5.48304 | 0.949747 | 0.972388 | 1.903612 | 3.790879 | 4.566304 | 1.807714 | 2.254633 | 17.71351 | 4.672638 | 5.411453 | 2.220798 | 1.031949 | 4.665846 |
| 1960 | 5.181857 | 0.881206 | 0.940224 | 1.746535 | 3.337207 | 4.147691 | 1.854893 | 2.057986 | 18.83669 | 4.514381 | 5.01491 | 1.962112 | 0.921115 | 4.338352 |
| 1950 | 5.008113 | 0.827591 | 0.852169 | 1.619136 | 2.876015 | 3.657986 | 1.775726 | 1.714632 | 18.2517 | 4.222285 | 4.71392 | 1.832377 | 0.852535 | 3.736308 |
| 1940 | 4.771045 | 0.748802 | 0.781497 | 1.474041 | 2.968922 | 3.568055 | 1.619229 | 1.859129 | 15.71869 | 4.206414 | 4.522815 | 2.054322 | 0.893341 | 3.032914 |
| 1930 | 4.538528 | 0.721865 | 0.732246 | 1.359723 | 2.77726 | 4.048543 | 1.424337 | 2.13431 | 14.13337 | 3.928515 | 4.774437 | 1.44474 | 0.833712 | 2.609365 |
| 1920 | 4.194047 | 0.693929 | 0.665613 | 1.205833 | 2.50138 | 3.647042 | 1.258867 | 1.870112 | 13.14473 | 3.612861 | 4.188382 | 1.44474 | 0.700281 | 2.352966 |
| 1910 | 4.010527 | 0.649023 | 0.622431 | 1.452166 | 2.43688 | 1.551913 | 1.232575 | 0.861136 | 13.36703 | 3.443256 | 4.12468 | 1.393473 | 0.97232 | 2.026985 |
| 1900 | 3.503176 | 0.603658 | 0.561635 | 1.393908 | 2.325091 | 1.34559 | 1.137216 | 1.73411 | 10.90422 | 3.100562 | 3.737693 | 1.305108 | 0.881055 | 1.754703 |
|  | | | | | | | | | | | | | | |
| Year | Italy | Spain | Greece | Estonia | Germany | Czech Republic | Bulgaria | Ireland | Denmark | Netherlands | France | Belgium | Austria | Switzerland |
| 2010 | 3.692115 | 1.25677 | 1.717469 | 1.614751 | 6.164579 | 5.123622 | 3.840897 | 1.571712 | 5.264434 | 10.6666 | 3.943786 | 16.13348 | 3.388815 | 5.207226 |
| 2000 | 3.744764 | 1.286975 | 1.694059 | 1.603635 | 6.471795 | 4.879554 | 3.913163 | 1.485012 | 5.323693 | 10.18692 | 3.836237 | 16.27091 | 3.340702 | 5.159 |
| 1990 | 3.688132 | 1.254704 | 1.617118 | 1.837773 | 6.274571 | 4.923209 | 4.316363 | 1.376959 | 5.134245 | 9.56295 | 3.667366 | 15.91265 | 3.209298 | 4.867797 |
| 1980 | 3.669719 | 1.211021 | 1.540816 | 1.719124 | 6.118305 | 4.909766 | 4.262344 | 1.342467 | 5.111799 | 9.048403 | 3.483862 | 15.67021 | 3.111384 | 4.508256 |
| 1970 | 3.505924 | 1.095354 | 1.405039 | 1.586668 | 6.074064 | 4.659855 | 4.076469 | 1.161988 | 4.938812 | 8.320601 | 3.2829 | 15.33261 | 3.080778 | 4.440129 |
| 1960 | 3.273023 | 0.990309 | 1.330671 | 1.414779 | 5.680507 | 4.597959 | 3.777706 | 1.103484 | 4.582861 | 7.331512 | 2.953911 | 14.58162 | 2.910036 | 3.795971 |
| 1950 | 3.060562 | 0.901246 | 1.207086 | 1.28829 | 5.344636 | 4.225872 | 3.481488 | 1.161479 | 4.259832 | 6.438615 | 2.704648 | 13.72498 | 2.856692 | 3.339055 |
| 1940 | 2.845042 | 0.832677 | 1.173673 | 1.233295 | 5.529885 | 4.162313 | 3.138405 | 1.157569 | 3.835345 | 5.67267 | 2.521726 | 13.3421 | 2.75989 | 2.995589 |
| 1930 | 2.64466 | 0.758216 | 1.020622 | 1.310522 | 5.104124 | 5.070609 | 2.771073 | 1.145837 | 3.541946 | 5.02475 | 2.690488 | 12.85595 | 2.753299 | 2.879731 |
| 1920 | 2.458443 | 0.685473 | 0.801672 | 1.275185 | 4.856031 | 4.777804 | 2.327394 | 1.705067 | 3.055706 | 4.337018 | 2.521726 | 11.86109 | 2.658968 | 2.74794 |
| 1910 | 2.245859 | 0.641198 | 0.850106 | 0.551589 | 5.074891 | 4.893995 | 2.082747 | 1.712889 | 2.733476 | 3.761788 | 2.556642 | 11.79436 | 2.738593 | 2.65793 |
| 1900 | 2.110049 | 0.598299 | 0.792899 | 0.532634 | 4.405039 | 4.482718 | 1.797909 | 1.748085 | 2.424214 | 3.27755 | 2.51526 | 10.63412 | 2.473108 | 2.34789 |

Each value per country and time is the settlement area per country in per cent

The values on this slide are derived using the population density of the year 2000 lowered by 20%

Part 4: Estimated settlement area in per cent calculated with population density of year 2000 decreased by 30%:

| Year | UK | Sweden | Finland | Slovenia | Slovakia | Romania | Portugal | Poland | Malta | Hungary | Luxembourg | Lithuania | Latvia | Cyprus |
| --- | --- | --- | --- | --- | --- | --- | --- | --- | --- | --- | --- | --- | --- | --- |
| 2010 | 5.157121 | 0.937545 | 0.975496 | 1.956319 | 4.277407 | 4.474871 | 1.800427 | 2.430075 | 20.20337 | 3.829413 | 5.880456 | 2.105874 | 0.984002 | 5.49952 |
| 2000 | 5.15223 | 0.912463 | 0.95616 | 1.853983 | 3.948213 | 4.397771 | 1.867909 | 2.335671 | 19.5789 | 3.973505 | 6.095051 | 2.304312 | 0.911939 | 5.019056 |
| 1990 | 4.993754 | 0.883412 | 0.924908 | 1.923522 | 3.872987 | 4.553893 | 1.800701 | 2.307701 | 18.21733 | 4.104898 | 5.35651 | 2.310356 | 1.026426 | 4.678231 |
| 1980 | 4.877743 | 0.855369 | 0.885903 | 1.83667 | 3.648845 | 4.356621 | 1.783136 | 2.159731 | 16.67149 | 4.237121 | 5.084783 | 2.125562 | 0.963193 | 4.173943 |
| 1970 | 4.79766 | 0.831028 | 0.850839 | 1.665661 | 3.317019 | 3.995516 | 1.58175 | 1.972804 | 15.49932 | 4.088558 | 4.735021 | 1.943198 | 0.902955 | 4.082616 |
| 1960 | 4.534125 | 0.771055 | 0.822696 | 1.528218 | 2.920056 | 3.629229 | 1.623032 | 1.800738 | 16.4821 | 3.950084 | 4.388047 | 1.716848 | 0.805976 | 3.796058 |
| 1950 | 4.382099 | 0.724142 | 0.745648 | 1.416744 | 2.516513 | 3.200737 | 1.55376 | 1.500303 | 15.97024 | 3.694499 | 4.12468 | 1.60333 | 0.745968 | 3.269269 |
| 1940 | 4.174664 | 0.655201 | 0.68381 | 1.289786 | 2.597806 | 3.122048 | 1.416825 | 1.626738 | 13.75386 | 3.680612 | 3.957463 | 1.797532 | 0.781673 | 2.653799 |
| 1930 | 3.971212 | 0.631632 | 0.640715 | 1.189758 | 2.430102 | 3.542475 | 1.246295 | 1.867522 | 12.3667 | 3.437451 | 4.177632 | 1.264147 | 0.729498 | 2.283194 |
| 1920 | 3.669791 | 0.607188 | 0.582411 | 1.055104 | 2.149596 | 3.191161 | 1.101508 | 1.636348 | 11.50164 | 3.161254 | 3.664834 | 1.297916 | 0.612746 | 2.058845 |
| 1910 | 3.509211 | 0.567895 | 0.544627 | 1.270646 | 2.13227 | 1.357924 | 1.078503 | 0.753494 | 11.69615 | 3.012849 | 3.609095 | 1.219289 | 0.85078 | 1.773612 |
| 1900 | 3.065279 | 0.5282 | 0.49143 | 1.21967 | 2.034455 | 1.177391 | 0.995064 | 1.517346 | 9.541193 | 2.712992 | 3.270481 | 1.141969 | 0.770923 | 1.535365 |
|  | | | | | | | | | | | | | | |
| Year | Italy | Spain | Greece | Estonia | Germany | Czech Republic | Bulgaria | Ireland | Denmark | Netherlands | France | Belgium | Austria | Switzerland |
| 2010 | 3.230601 | 1.099674 | 1.502785 | 1.412907 | 5.394006 | 4.483169 | 3.360785 | 1.375248 | 4.60638 | 9.333273 | 3.450813 | 14.1168 | 2.965213 | 4.556323 |
| 2000 | 3.276669 | 1.126103 | 1.482302 | 1.40318 | 5.662821 | 4.26961 | 3.424018 | 1.299386 | 4.658231 | 8.913553 | 3.356708 | 14.23705 | 2.923114 | 4.514125 |
| 1990 | 3.227116 | 1.097866 | 1.414978 | 1.608052 | 5.49025 | 4.307808 | 3.776818 | 1.204839 | 4.492465 | 8.367581 | 3.208945 | 13.92357 | 2.808136 | 4.259322 |
| 1980 | 3.211004 | 1.059643 | 1.348214 | 1.504234 | 5.353517 | 4.296045 | 3.729551 | 1.174659 | 4.472824 | 7.917353 | 3.048379 | 13.71144 | 2.722461 | 3.944724 |
| 1970 | 3.067684 | 0.958435 | 1.229409 | 1.388335 | 5.314806 | 4.077373 | 3.566911 | 1.016739 | 4.32146 | 7.280526 | 2.872537 | 13.41603 | 2.695681 | 3.885113 |
| 1960 | 2.863895 | 0.86652 | 1.164337 | 1.237932 | 4.970444 | 4.023214 | 3.305493 | 0.965548 | 4.010004 | 6.415073 | 2.584672 | 12.75892 | 2.546281 | 3.321475 |
| 1950 | 2.677992 | 0.78859 | 1.0562 | 1.127254 | 4.676556 | 3.697638 | 3.046302 | 1.016295 | 3.727353 | 5.633788 | 2.366567 | 12.00936 | 2.499605 | 2.921673 |
| 1940 | 2.489412 | 0.728592 | 1.026964 | 1.079133 | 4.838649 | 3.642024 | 2.746105 | 1.012873 | 3.355927 | 4.963586 | 2.20651 | 11.67434 | 2.414903 | 2.621141 |
| 1930 | 2.314078 | 0.663439 | 0.893044 | 1.146707 | 4.466109 | 4.436783 | 2.424689 | 1.002607 | 3.099203 | 4.396656 | 2.354177 | 11.24895 | 2.409136 | 2.519765 |
| 1920 | 2.151138 | 0.599789 | 0.701463 | 1.115787 | 4.249027 | 4.180578 | 2.03647 | 1.491934 | 2.673743 | 3.79489 | 2.20651 | 10.37845 | 2.326597 | 2.404447 |
| 1910 | 1.965127 | 0.561048 | 0.743842 | 0.482641 | 4.44053 | 4.282245 | 1.822403 | 1.498778 | 2.391791 | 3.291564 | 2.237062 | 10.32007 | 2.396269 | 2.325689 |
| 1900 | 1.846293 | 0.523512 | 0.693787 | 0.466054 | 3.854409 | 3.922378 | 1.57317 | 1.529575 | 2.121187 | 2.867856 | 2.200853 | 9.304854 | 2.16397 | 2.054404 |

Each value per country and time is the settlement area per country in per cent

The values on this slide are derived using the population density of the year 2000 lowered by 30%
